# Supplementary material for: Analysis of O-acetylated sialic acids by 3-nitrophenylhydrazine derivatization combined with LC-MS/MS
Source: Royal Society of Chemistry journal article supplement (doi:10.1039/d4ay00330f), 2024-01-01
Supplement: d4ay00330f9.pdf [file d4ay00330f9.pdf]

## Supporting Information

1           **Analysis of *O*-acetylated sialic acids by 3-nitrophenylhydrazine**  
2                           **derivatization combined with LC-MS/MS**

3   Chenhao Zhao,<sup>ab</sup> Xingdan Wang,<sup>a</sup> Jing Wu,<sup>a</sup> Yeli Hu,<sup>b</sup> Qiwei Zhang <sup>\*a</sup> and Qi Zheng <sup>a</sup>

4

5

6 <sup>a</sup> Key Laboratory of Optoelectronic Chemical Materials and Devices, Ministry of  
7 Education, School of Optoelectronic Materials & Technology, Jiangnan University,  
8 Wuhan 430056, Hubei, People's Republic of China

9 <sup>b</sup> School of Environmental Ecology and Biological Engineering, Wuhan Institute of  
10 Technology, Wuhan 430205, Hubei, People's Republic of China

11

12

13

14

15

16

17

18

19

20 \*Corresponding author: Dr. Qiwei Zhang, School of Optoelectronic Materials and  
21 Technology, Jiangnan University, Wuhan, 430056, China, E-mail:  
22 keewezhang@jhun.edu.cn

23

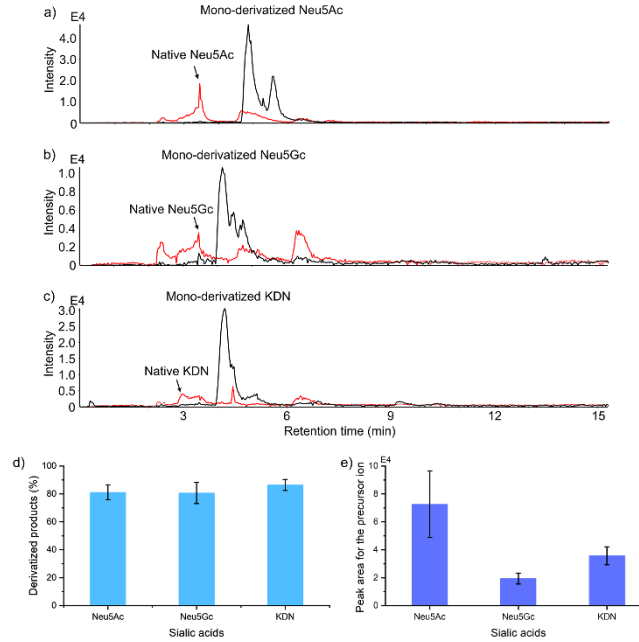

1

2 **Fig. S1** The extracted ion chromatograms (XICs) display the mono-derivatized and native  
 3 forms of Neu5Ac (a), Neu5Gc (b), and KDN (c) after the first-step derivatization. To detect  
 4 native sialic acids, the undesalted samples were analyzed directly by LC-MS. Black line:  
 5 mono-derivatized products; red line: native sialic acids. (d) The efficiency of the first-step  
 6 derivatization was calculated based on the peak area of the precursor ion ( $n = 3$ ). Each  
 7 efficiency = (mono-derivatized product)/(sum of mono-derivatized product and native  
 8 sialic acid)  $\times 100\%$ . (e) The repeatability of the first-step derivatization was assessed by  
 9 measuring the peak area of the precursor ion ( $n = 3$ ).

10

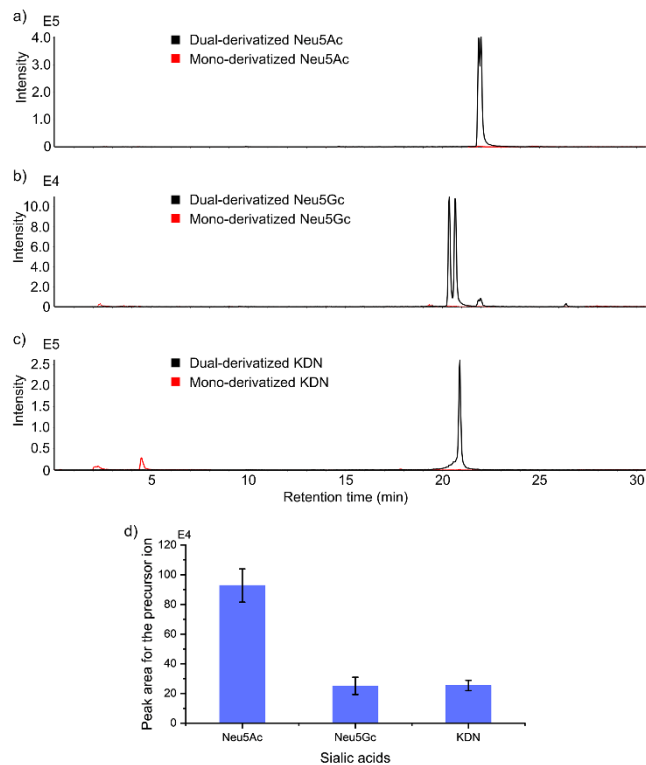

1

2 **Fig. S2** The XICs display both the di-derivatized and mono-derivatized forms of Neu5Ac  
 3 (a), Neu5Gc (b), and KDN (c) after undergoing a two-step derivatization. Black line: di-  
 4 derivatized products; red line: mono-derivatized products. The MS/MS spectrum for the  
 5 peak with a retention time of 4.6 min in Figure c indicates that it is not a mono-derivatized  
 6 product. (d) The repeatability of dual derivatization was assessed by measuring the peak  
 7 area of the precursor ion (n = 3).

8

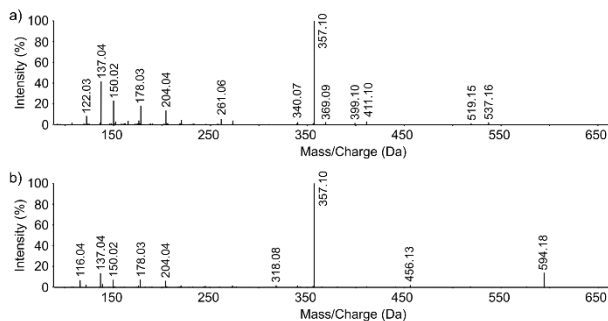

9

10 **Fig. S3** The MS/MS spectra for 3-NPH-labeled KDN (a) and Neu5Gc (b).

11

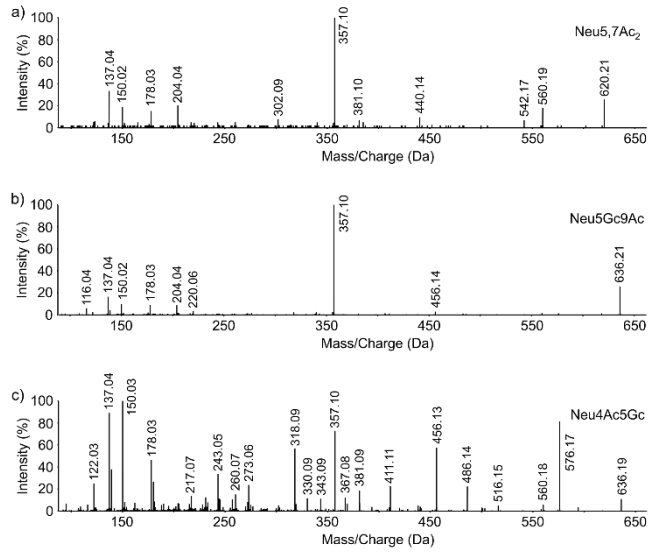

1

2 **Fig. S4** The MS/MS spectra for 3-NPH-labeled Neu5,7Ac<sub>2</sub> (a) and Neu5Gc9Ac (b) from a  
 3 commercial reference; The MS/MS spectrum for 3-NPH-labeled Neu4Ac5Gc (c) from a  
 4 horse serum sample.

5

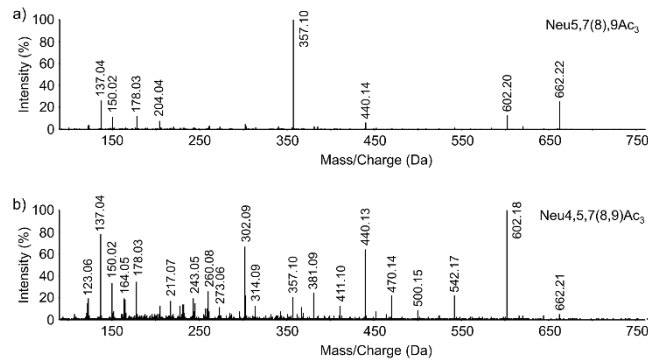

6

7 **Fig. S5** (a) The MS/MS spectrum for 3-NPH-labeled Neu5,7(8),9Ac<sub>3</sub> from a commercial  
 8 reference; (b) The MS/MS spectrum for 3-NPH-labeled Neu4,5,7(8,9)Ac<sub>3</sub> from a horse  
 9 serum sample.

10

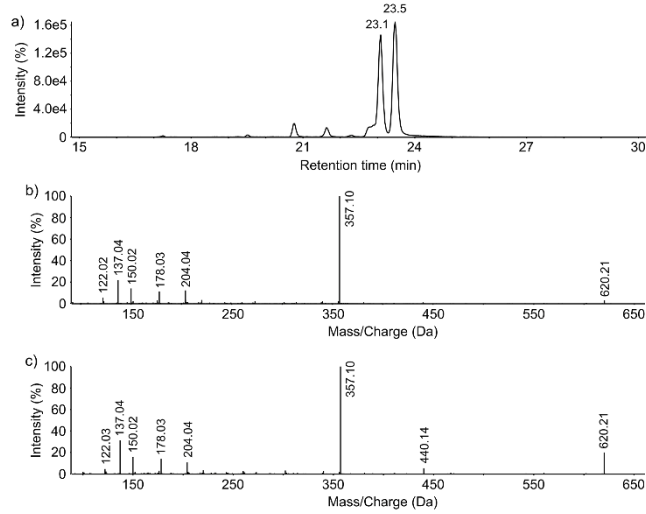

1

2 **Fig. S6** (a) The XIC at  $m/z$  620.20 Da from a commercial reference. The MS/MS spectra  
 3 for the species at retention times of 23.1 (b) and 23.5 (c) min. Both peaks correspond to  
 4 Neu5,9Ac<sub>2</sub>.

5

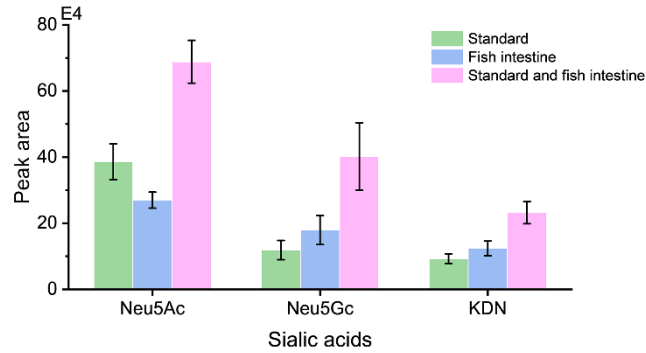

6

7 **Fig. S7** The peak area for the report ion at  $m/z$  357.09 Da was obtained using PRM mode.  
 8 Three sample groups were analyzed, including sialic acid standards (Neu5Ac, Neu5Gc,  
 9 and KDN), carp intestinal tissue, and a mixture of standards and tissue. The peak area  
 10 corresponding to the mixture is between 104% and 135% of the sum of the standard and  
 11 the tissue.

12

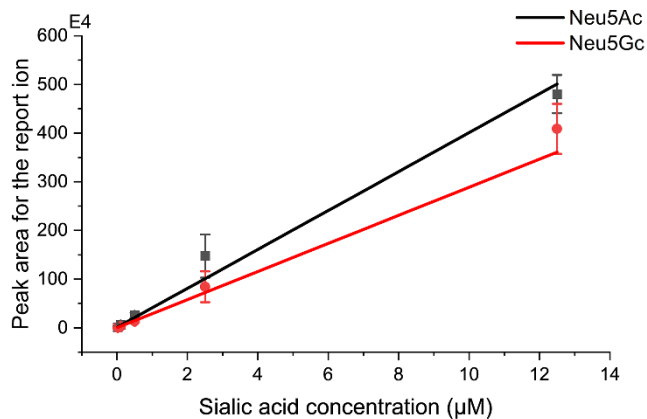

1

2 **Fig. S8** Linear fitting for 3-NPH-labeled Neu5Ac and Neu5Gc (n = 3). y = peak area for  
 3 the report ion at  $m/z$  357.09 Da; x = concentration.

4

5 **Table S1.** The main product ions for sialic acids labeled with 3-NPH.

| No. | Sialic acid                                          | Abbreviation          | Source               | $m/z$<br>[M-H] <sup>-</sup> | Product ions                                                           |
|-----|------------------------------------------------------|-----------------------|----------------------|-----------------------------|------------------------------------------------------------------------|
| 1   | <i>N</i> -Acetylneuraminic acid                      | Neu5Ac                | Commercial reference | 578.19                      | 178.03, 204.05, 302.09, 357.09, 440.13                                 |
| 2   | <i>N</i> -Glycolylneuraminic acid                    | Neu5Gc                | Commercial reference | 594.18                      | 178.03, 204.05, 318.09, 357.09, 456.13                                 |
| 3   | Deaminoneuraminic acid                               | KDN                   | Commercial reference | 537.16                      | 178.03, 204.05, 261.07, 357.09, 399.11, 411.11                         |
| 4   | 4- <i>O</i> -Acetyl- <i>N</i> -acetylneuraminic acid | Neu4,5Ac <sub>2</sub> | Horse serum          | 620.20                      | 178.03, 243.05, 260.08, 302.09, 357.09, 381.09, 440.13, 470.14, 560.19 |
| 5   | 7- <i>O</i> -Acetyl- <i>N</i> -acetylneuraminic acid | Neu5,7Ac <sub>2</sub> | Commercial reference | 620.20                      | 178.03, 204.05, 302.09, 357.09, 440.13, 560.19                         |

|    |                                                                                   |                              |                         |        |                                                                              |
|----|-----------------------------------------------------------------------------------|------------------------------|-------------------------|--------|------------------------------------------------------------------------------|
| 6  | 9- <i>O</i> -Acetyl- <i>N</i> -<br>acetylneuraminic acid                          | Neu5,9Ac <sub>2</sub>        | Commercial<br>reference | 620.20 | 178.03, 204.05, 357.09,<br>440.13                                            |
| 7  | 4- <i>O</i> -Acetyl- <i>N</i> -<br>glycolylneuraminic acid                        | Neu4Ac5Gc                    | Horse serum             | 636.19 | 178.03, 243.05, 260.08,<br>318.09, 357.09, 381.09,<br>456.13, 486.14, 576.18 |
| 8  | 9- <i>O</i> -Acetyl- <i>N</i> -<br>glycolylneuraminic acid                        | Neu5Gc9Ac                    | Commercial<br>reference | 636.19 | 178.03, 204.05, 357.09,<br>456.13                                            |
| 9  | 7(8),9-Di- <i>O</i> -acetyl- <i>N</i> -<br>acetylneuraminic acid                  | Neu5,7(8),9Ac <sub>3</sub>   | Commercial<br>reference | 662.21 | 178.03, 204.05, 302.09,<br>357.09, 440.13, 602.20                            |
| 10 | 4,9-Di- <i>O</i> -acetyl- <i>N</i> -<br>acetylneuraminic acid                     | Neu4,5,9Ac <sub>3</sub>      | Horse serum             | 662.21 | 178.03, 260.08, 302.09,<br>357.09, 381.09, 440.13,<br>470.14, 542.16, 602.19 |
| 11 | 4,7,8(9)-Tri- <i>O</i> -acetyl- <i>N</i> -<br>acetylneuraminic acid               | Neu4,5,7,8(9)Ac <sub>4</sub> | Crucian<br>carp blood   | 704.22 | 178.03, 260.08, 302.09,<br>357.09, 381.09, 440.13,<br>452.13, 584.18, 644.20 |
| 12 | 4,8,9-Tri- <i>O</i> -acetyl- <i>N</i> -<br>acetylneuraminic acid                  | Neu4,5,8,9Ac <sub>4</sub>    | Crucian<br>carp blood   | 704.22 | 178.03, 260.08, 302.09,<br>357.09, 381.09, 440.13,<br>470.14, 584.18, 644.20 |
| 13 | 8- <i>O</i> -Methyl- <i>N</i> -<br>glycolylneuraminic acid                        | Neu5Gc8Me                    | Starfish                | 608.19 | 178.03, 204.05, 318.09,<br>357.09, 456.13                                    |
| 14 | 8- <i>O</i> -Methyl-7- <i>O</i> -acetyl- <i>N</i> -<br>glycolylneuraminic<br>acid | Neu5Gc7Ac8Me                 | Starfish                | 650.20 | 178.03, 357.09, 456.13,<br>590.18                                            |

---

|    |                                          |              |          |        |                         |
|----|------------------------------------------|--------------|----------|--------|-------------------------|
|    | 8- <i>O</i> -Methyl-9- <i>O</i> -acetyl- |              |          |        |                         |
| 15 | <i>N</i> -glycolylneuraminic             | Neu5Gc8Me9Ac | Starfish | 650.20 | 178.03, 204.05, 318.09, |
|    | acid                                     |              |          |        | 357.09, 456.13          |

---

1

2 **Table S2.** Quantitative calibration curves using the 3-NPH labeling and PRM method.

| <b>Sialic acid</b> | <b>Regression equation</b> | <b>R<sup>2</sup></b> | <b>LLOQ<sup>a</sup><br/>(<math>\mu</math>M)</b> | <b>LOD<sup>b</sup><br/>(<math>\mu</math>M)</b> |
|--------------------|----------------------------|----------------------|-------------------------------------------------|------------------------------------------------|
| Neu5Ac             | $y = 0.93731 + 39.99596x$  | 0.985                | 0.02                                            | 0.005                                          |
| Neu5Gc             | $y = 0.0084 + 28.87818x$   | 0.985                | 0.02                                            | 0.01                                           |

3 <sup>a</sup>LLOQ: lower limit of quantification; <sup>b</sup>LOD: limit of detection.

4

5
