# Supplementary figures and images for: Analysis of O-acetylated sialic acids by 3-nitrophenylhydrazine derivatization combined with LC-MS/MS
Source: Royal Society of Chemistry journal article supplement (doi:10.1039/d4ay00330f), 2024-01-01

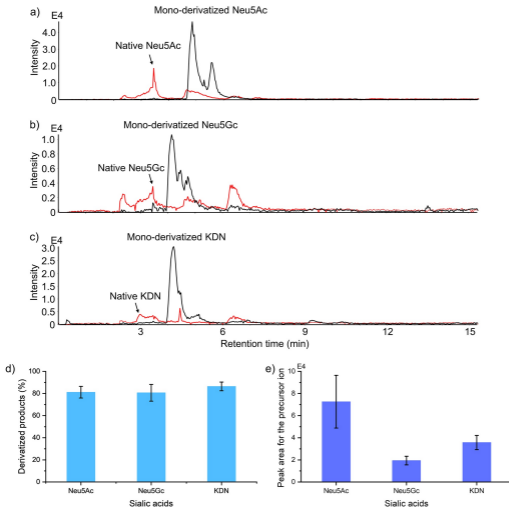

Supplement: d4ay00330f1.pdf [file d4ay00330f1.pdf]

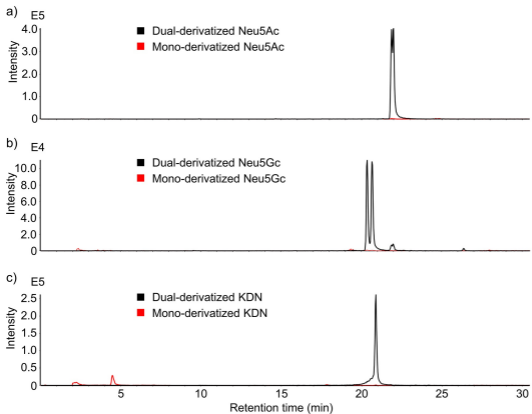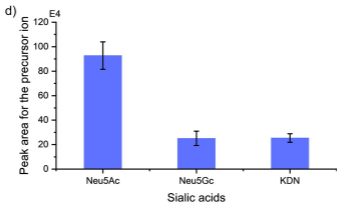

Supplement: d4ay00330f2.pdf [file d4ay00330f2.pdf]

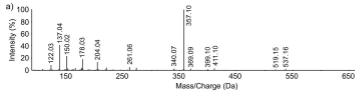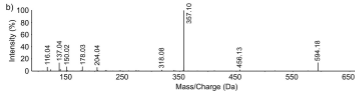

Supplement: d4ay00330f3.pdf [file d4ay00330f3.pdf]

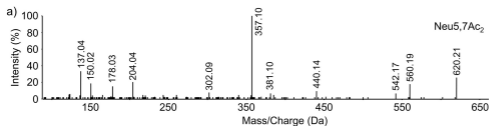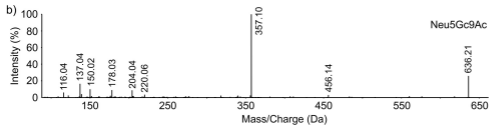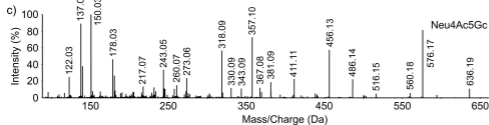

Supplement: d4ay00330f4.pdf [file d4ay00330f4.pdf]

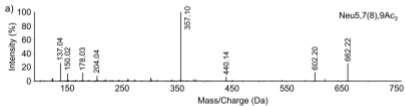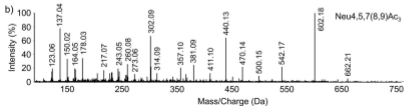

Supplement: d4ay00330f5.pdf [file d4ay00330f5.pdf]

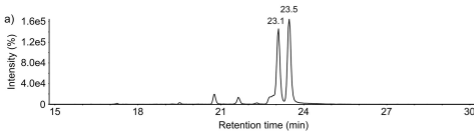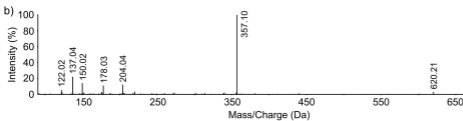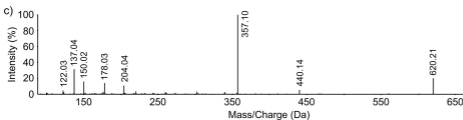

Supplement: d4ay00330f6.pdf [file d4ay00330f6.pdf]

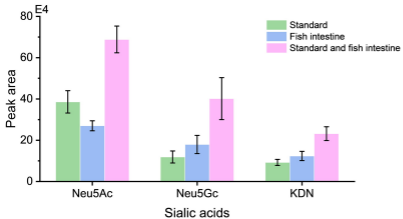

Supplement: d4ay00330f7.pdf [file d4ay00330f7.pdf]

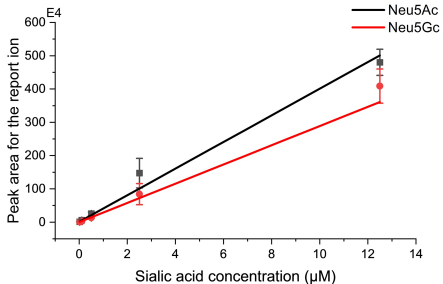

Supplement: d4ay00330f8.pdf [file d4ay00330f8.pdf]
